# Supplementary material
Source: PubMed Central journal article supplement (PMC4303320)
Supplement: bi500989r_si_001.pdf [file bi500989r_si_001.pdf]

## **Supplementary Information**

### **Understanding Mixed Sequence DNA Recognition by Novel Designed Compounds: The Kinetic and Thermodynamic Behavior of Azabenzimidazole Diamidines**

**Ananya Paul,<sup>§</sup> Yun Chai,<sup>§,1</sup> David W. Boykin,<sup>§</sup> and W. David Wilson<sup>\*,§</sup>**

<sup>§</sup>Department of Chemistry and Center for Diagnostics and Therapeutics, Georgia State  
University, Atlanta, GA 30303-3083, USA

**Address correspondence to this author**

\*W. David Wilson Tel: 404-413-5503; Fax: 404-413-5505; Email: [wdw@gsu.edu](mailto:wdw@gsu.edu)

<sup>1</sup>Present address: Institute of Medicinal Biotechnology, Chinese Academy of Medical  
Sciences and Peking Union Medical College, Beijing 100050, China

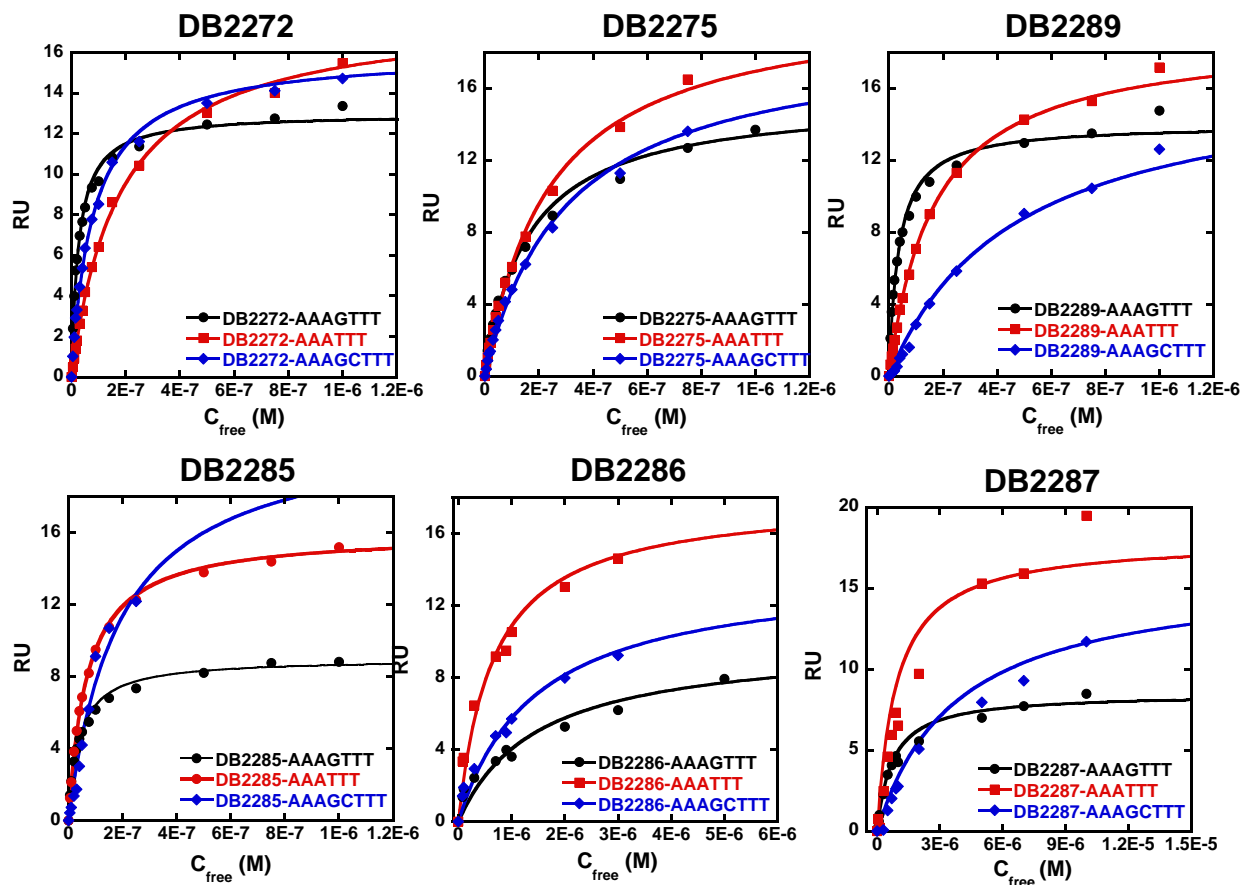

**Figure S1:** SPR equilibrium binding plots of selected diamidines with AAAGTTT, AAATTT and AAAGCTTT sequence at 100 mM NaCl concentrations and 25 °C. The steady state response values were fitted as a function of free ligand concentration to a single-site interaction model. The binding affinities are listed in Table 1.

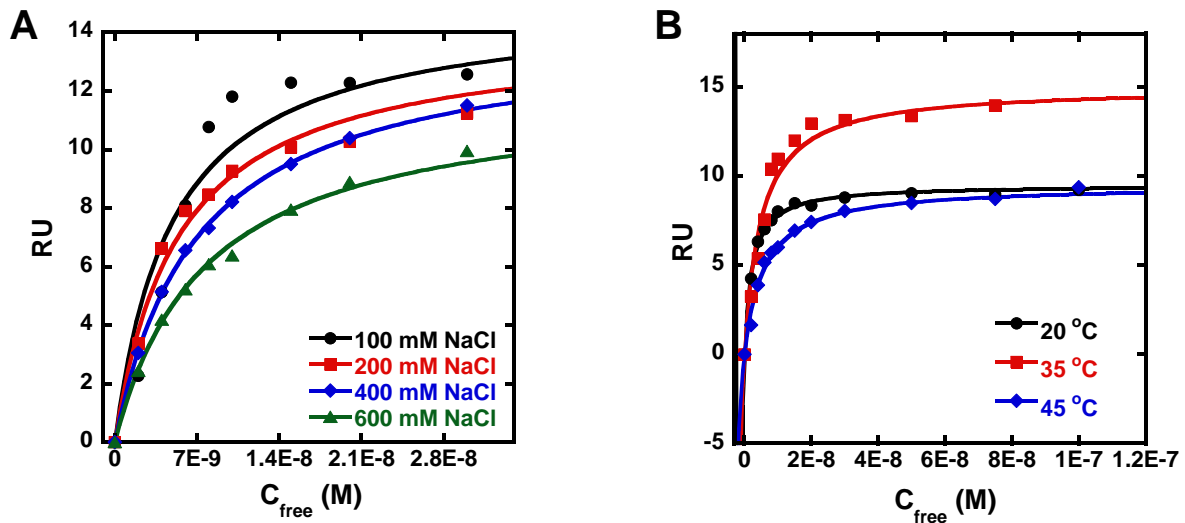

**Figure S2:** SPR equilibrium binding plots of DB2277 with AAAGTTT hairpin DNA sequence, (A) different salt concentrations at 25 °C and (B) different temperatures at 200 mM NaCl concentration. The steady state response values were fitted as a function of free ligand concentration to a single-site interaction model. The binding affinities are listed in the inset and in Table 2 and 3.

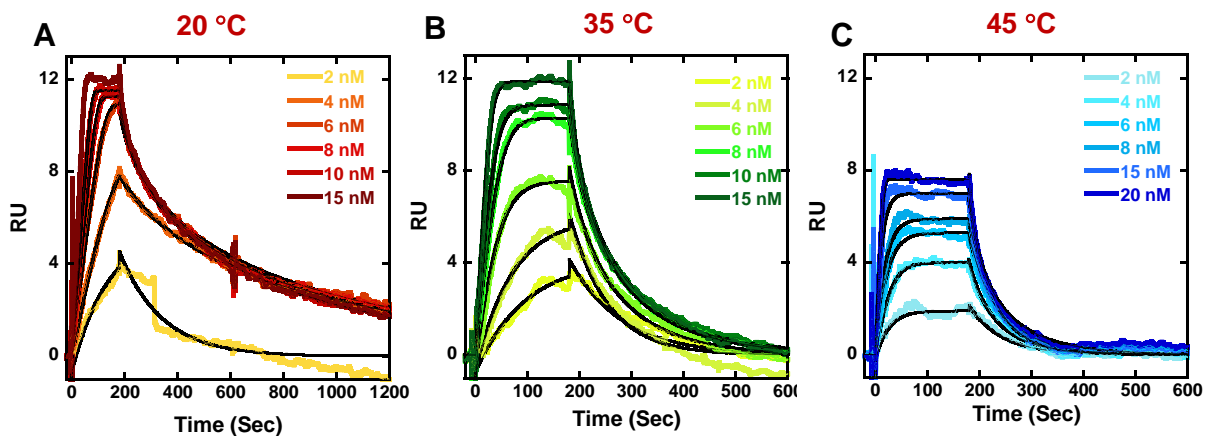

**Figure S3:** (A-C) SPR sensorgrams (color) and global kinetic fits (black overlays) for DB2277 with the AAAGTTT DNA sequence at different temperatures as mentioned above.

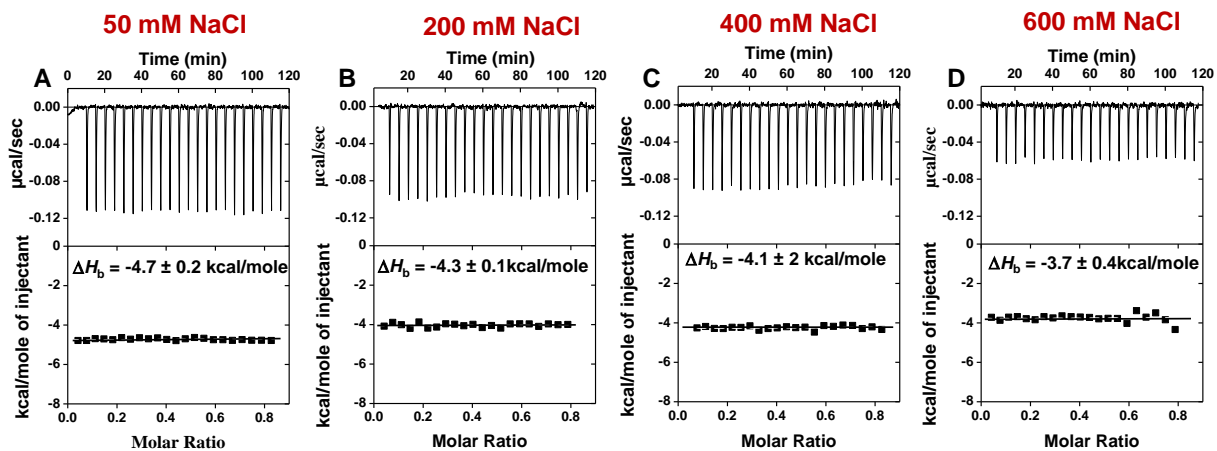

**Figure S4:** (A-E) ITC data for the titration of DB2277 and AAAGTTT hairpin duplex DNA at different salt concentrations.

A

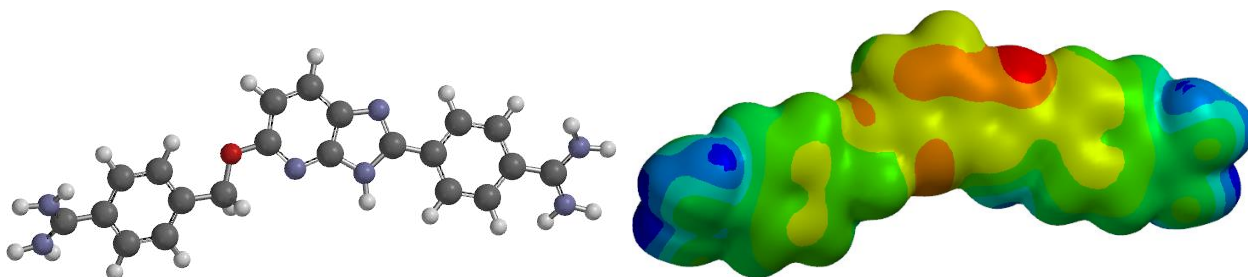

B

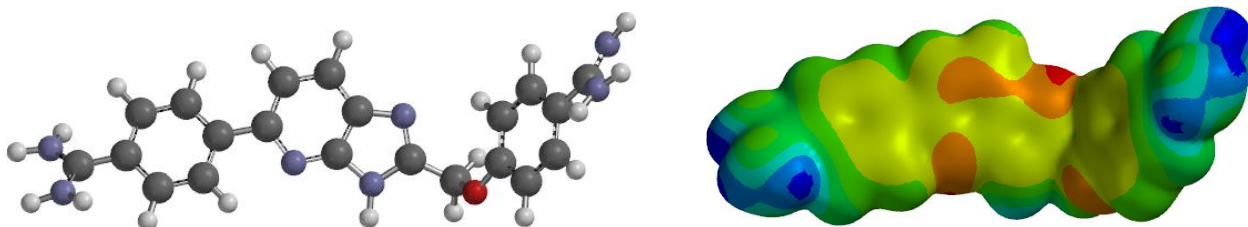

C

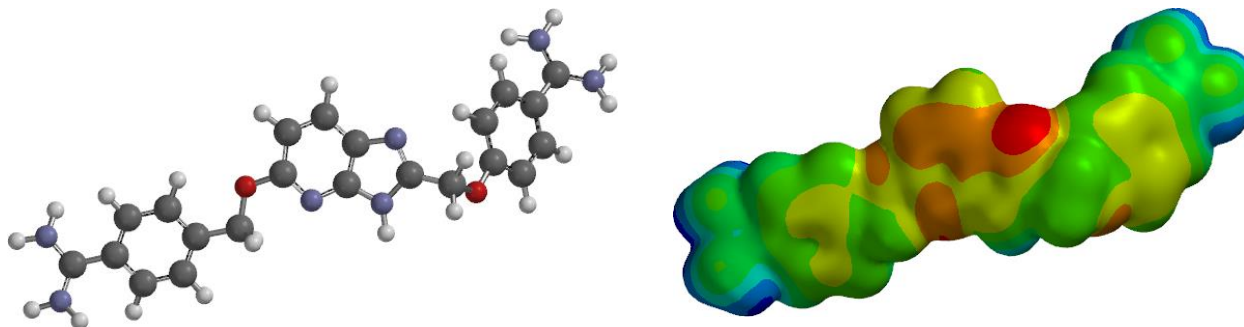

**Figure S5:** DFT ab initio calculations at the 6-31G\* (p,d) level of theory for DB2277 (A), DB2275 (B) and DB2272 (C) with their respective electrostatic potential maps
